# Supplementary material
Source: publisher figshare collection journal article supplement (https://acs.figshare.com/ndownloader/files/4015159)
Supplement: Supplementary file 1 [file 4015159]

# Stereochemistry Rules: a Single Stereocenter Changes the Conformation of a Cyclic Tetrapeptide

## Supporting Information

Fee Li<sup>1</sup>, Kenny Bravo-Rodriguez<sup>2</sup>, Miguel Fernandez-Oliva<sup>1</sup>, Juan M. Ramirez-Anguila<sup>2</sup>, Klaus Merz<sup>3</sup>, Manuela Winter<sup>4</sup>, Christian W. Lehmann<sup>2</sup>, Wolfram Sander<sup>1\*</sup> and Elsa Sanchez-Garcia<sup>2\*</sup>

<sup>1</sup>Lehrstuhl für Organische Chemie II der Ruhr-Universität Bochum, D-44801 Bochum, Germany.

<sup>2</sup>Max-Planck-Institut für Kohlenforschung, Kaiser-Wilhelm-Platz 1, 45470 Mülheim, Germany.

<sup>3</sup>Lehrstuhl für Anorganische Chemie I der Ruhr-Universität Bochum, D-44801 Bochum, Germany.

<sup>4</sup>Lehrstuhl für Anorganische Chemie II der Ruhr-Universität Bochum, D-44801 Bochum, Germany.

|                                                  |    |
|--------------------------------------------------|----|
| Peptide Synthesis Strategy .....                 | 2  |
| X-Ray structural details .....                   | 6  |
| NMR studies .....                                | 9  |
| Temperature-dependent FITR/ATR experiments ..... | 14 |
| Computational Details .....                      | 15 |

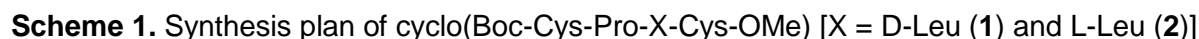

**H-Cys(Acm)-OH<sup>+</sup>HCl (11):** Boc-Cys(Acm)-OH<sup>+</sup>HCl (9.36 g, 0.032 mol) was dissolved in hydrochloric acid (1.2 N, 30 mL)/acetic acid (30 mL) and the reaction mixture was stirred for 20 minutes at 20°C. The solvent was evaporated to give colorless oil. 100 mL of dry ether were added to the compound, and the flask was placed in an ultrasonic bath for one hour. The precipitated colorless solid was obtained after extraction and was dried under high vacuum conditions (13.85 g, 94.6%). The product is hygroscopic and was kept under argon. <sup>1</sup>H NMR (400 MHz, (d<sub>6</sub>)DMSO): δ = 8.76 (t, J = 6.3 Hz, Acm NH), 4.35-4.15 (m, Acm CH<sub>2</sub>, Cys αCH), 3.74 (s, OCH<sub>3</sub>), 3.58 (s, NH<sub>3</sub><sup>+</sup>), 3.18-3.03 (Cys βCH<sub>2</sub>), 1.85 (s, Acm CH<sub>3</sub>) ppm. <sup>13</sup>C NMR (101 MHz, (d<sub>6</sub>)DMSO): δ = 169.67 (Cys CO), 168.60 (Acm CO), 52.15 (Cys αCH), 40.63 (Acm CH<sub>2</sub>), 30.28 (Cys βCH<sub>2</sub>), 22.63 (Acm CH<sub>3</sub>) ppm. FAB *m/z*: 193.1 (100) [M - HCl + H]<sup>+</sup>.

**H-Cys(Acm)-OMe·HCl (10):** Methanol (30 mL) was placed in a double-walled reaction flask and cooled to -15°C. Thionyl chloride (5.2 mL, 0.073 mol) was added drop wise to the stirred methanol. Thereby the temperature should not increase beyond -5°C. H-Cys(Acm)-OH·HCl was added to the reaction mixture at once and stirred for 30 minutes at -5°C and then for five hours at 50°C. After removal of the solvent, the crude was carefully co-evaporated (five times) using methanol to give a white foam as product (13.76 g, 93%). M. p. 130 - 132°C. <sup>1</sup>H NMR (400 MHz, (d<sub>6</sub>)DMSO): δ = 8.82 (br., Acm NH, NH<sub>3</sub><sup>+</sup>), 4.33-4.18 (m, Acm CH<sub>2</sub>, Cys αCH), 3.74 (s, OCH<sub>3</sub>), 3.61 (br., NH<sub>3</sub><sup>+</sup>), 3.41-3.25 (Cys βCH<sub>2</sub>), 1.85 (s, Acm CH<sub>3</sub>) ppm. <sup>13</sup>C NMR (101 MHz, (d<sub>6</sub>)DMSO): δ = 169.67 (Cys CO), 168.60 (Acm CO), 52.94 (OCH<sub>3</sub>), 52.15 (Cys αCH), 40.63 (Acm CH<sub>2</sub>), 30.28 (Cys βCH<sub>2</sub>), 22.63 (Acm CH<sub>3</sub>) ppm. FAB *m/z*: 207.1 (100) [M - HCl + H]<sup>+</sup>.

**Stepwise elongation procedure using IBCF/NMM - Synthesis of dipeptide Boc-X-Cys(Acm)-OMe:** Boc-X-OH (0.064 mol) was stirred in a mixture of DCM/DMF (1:1) and the solution was cooled to -20°C. NMM (0.13 mol) and IBCF (0.064 mol) were added drop wise using a syringe. After ten minutes a cooled suspension of H-Cys(Acm)-OMe·HCl (X) (0.064 mol) and NMM (0.13 mol) in DCM/DMF (1:1) was added to the reaction mixture at once at -15°C. The suspension was stirred for one hour at -15°C and afterwards for 90 minutes at -5°C. The reaction mixture was raised to 20°C and the reaction was stopped by adding 5% KHCO<sub>3</sub> (5 mL). The solvent was removed carefully in vacuum to give a yellow solid. The residue was dissolved in ethyl acetate/5% KHSO<sub>4</sub> (200 mL) and washed with 5% KHSO<sub>4</sub> (40 mL, four times), 5% KHCO<sub>3</sub> (40 mL, two times) and brine (20 mL). The organic layer was dried and the solvent was removed. The obtained crude compound was purified by column chromatography. Elution with DCM/Et<sub>2</sub>O (7:3 and 1:1) and ethyl acetate afforded pure colorless dipeptide.

X = D-Leu (**8**, 14.6 g, 54.4%). M. p. 114°C. <sup>1</sup>H NMR (400 MHz, (d<sub>6</sub>)DMSO): δ = 8.5 Hz, D-Leu NH), 4.49 (td, J = 8.2, 5.6 Hz, Cys αCH), 4.25-4.21 (m, Acm CH<sub>2</sub>), 4.02 (dd, J = 15.1, 8.0 Hz, D-Leu αCH), 3.64 (s, OCH<sub>3</sub>), 2.91 (ddd, J = 22.4, 13.8, 7.0 Hz, Cys βCH<sub>2</sub>), 1.83 (s, Acm CH<sub>3</sub>), 1.65-1.55 (m, D-Leu βCH<sub>2</sub>), 1.44-1.40 (m, D-Leu γCH), (0.86 t, J = 6.5 Hz, D-Leu CH<sub>3</sub>) ppm. <sup>13</sup>C NMR (101 MHz, (d<sub>6</sub>)DMSO): δ = 172.64 (Leu CO, d), 170.95 (OMe CO), 169.31 (Acm CO), 155.18 (Boc CO), 77.94 (Boc Cq), 52.55 (D-Leu αCH, e), 52.05 (Cys αCH), 51.95 (OCH<sub>3</sub>), 40.83 (D-Leu βCH<sub>2</sub>), 40.40 (Acm CH<sub>2</sub>), 31.71 (Cys βCH<sub>2</sub>), 28.13 (Boc CH<sub>3</sub>), 24.17 (D-Leu γCH), 22.89, 21.49 (D-Leu CH<sub>3</sub>), 22.48 (Acm CH<sub>3</sub>) ppm. IR:  $\tilde{\nu}$  = 3365, 3280, 3082, 2954, 1738, 1707, 1650, 1559, 1545, 1527, 1472, 1457, 1436, 1418, 1370, 1328, 1279, 1255, 1243, 1176, 1113, 1046, 1012, 705 cm<sup>-1</sup>. FAB-MS *m/z*: 442.2 (100) [M + Na]<sup>+</sup>, 320.2 (26) [M - Boc + H]<sup>+</sup>, 420.2 (43) [M + H]<sup>+</sup>. C<sub>18</sub>H<sub>33</sub>N<sub>3</sub>O<sub>6</sub>S (419.54): calcd. C 51.53, H 7.93, N 10.02, S 7.64; found C 51.53, H 8.13, N 10.38, S 7.80.

X = L-Leu (**9**, 20%). M. p. 85°C. <sup>1</sup>H NMR (400 MHz, (d<sub>6</sub>)DMSO): δ = 8.48 (t, J = 6.1 Hz, Acm-NH), 8.22 (d, J = 7.7 Hz, Cys NH), 6.81 (d, J = 8.5 Hz, L-Leu NH), 4.48 (Hc, Cys αCH), 4.29-4.15 (m, Acm CH<sub>2</sub>), 4.01 (dd, J = 15.6, 7.7 Hz, L-Leu αCH), 3.62 (s, OCH<sub>3</sub>), 2.97, 2.85 (Ha, Hb, Cys βCH<sub>2</sub>), 1.84 (s, 3H, Acm CH<sub>3</sub>), 1.58 (tdd, J = 30.3, 19.1, 10.9 Hz, 1H, L-Leu γCH), 1.52-1.39 (m, L-Leu βCH<sub>2</sub>), 1.37 (s, Boc CH<sub>3</sub>), 0.93-0.81 (m, L-Leu-CH<sub>3</sub>) ppm. <sup>13</sup>C NMR (101 MHz, (d<sub>6</sub>)DMSO): δ = 172.67 (L-Leu CO), 170.97 (Acm CO), 169.40 (OMe CO), 155.18 (Boc CO), 77.96 (Boc Cq), 52.54 (L-Leu αCH), 52.26 (Cys αCH), 51.94 (OCH<sub>3</sub>), 40.75 (L-Leu βCH<sub>2</sub>), 40.48 (Acm CH<sub>2</sub>), 31.49 (Cys βCH<sub>2</sub>), 28.13 (Boc CH<sub>3</sub>), 24.14 (L-Leu γCH), 22.50 (Acm CH<sub>3</sub>), 22.89,

21.52 (L-Leu CH<sub>3</sub>) ppm. IR:  $\tilde{\nu}$  = 3334, 3245, 3051, 2956, 2871, 1730, 1690, 1652, 1527, 1448, 1437, 1417, 1374, 1367, 1325, 1274, 1248, 1235, 1210, 1167, 1114, 1093, 1056, 1029, 1012, 999, 985, 954, 920, 902, 875, 859, 800, 739, 710, 700, 635 cm<sup>-1</sup>. FAB *m/z*: 442.2 (100) [M + Na]<sup>+</sup>, 420.3 (53) [M + H]<sup>+</sup>, 320.2 (78) [M - Boc + H]<sup>+</sup>. C<sub>18</sub>H<sub>33</sub>N<sub>3</sub>O<sub>6</sub>S (419.54): calcd. C 51.53, H 7.93, N 10.02, S 7.64; found: C 51.53, H 7.72, N 9.93, S 7.40.

**Standard procedure for removing Boc protecting groups:** A solution of Boc protected peptide (0.014 mol) was dissolved in TFA (0.77 mol) and stirred for 100 minutes. The solvent was removed in vacuo and the obtained oil was co-evaporated with hexane (five times). Subsequently, dry ether was added and then placed in a supersonic bath. The deprotected peptide was obtained as a colorless powder (92 - 94%). The absence of signals of Boc was controlled by <sup>1</sup>H NMR spectroscopy.

**Stepwise elongation procedure using IBCF/NMM - Synthesis of tripeptide Boc-Pro-X-Cys(Acm)-OMe:** The synthesis of the tripeptides were carried out according to the stepwise elongation procedure.

X = D-Leu (**6**, 40.8%). M.p. 70°C. <sup>1</sup>H NMR (400 MHz, (d<sub>6</sub>)DMSO):  $\delta$  = 8.49-8.45 (m, 1H, Acm NH), 8.19 (d, J = 6.8 Hz, 1H, Cys(4) NH), 7.89-7.83 (m, D-Leu NH), 4.53 (Hc, Cys(4)  $\alpha$ CH), 4.39-4.32 (m, D-Leu  $\alpha$ CH), 4.20 (ddd, J = 32.6, 13.6, 6.3 Hz, Acm CH<sub>2</sub>), 4.10 (dd, J = 8.3, 3.3 Hz, Pro  $\alpha$ CH), 3.63 (s, 3H, OCH<sub>3</sub>), 3.39-3.24 (m, Pro  $\delta$ CH<sub>2</sub>), 2.89 (Ha, Hb, Cys(4)  $\beta$ CH<sub>2</sub>), 2.13-2.0, 1.80-1.68 (m, Pro  $\gamma,\beta$ CH<sub>2</sub>), 1.83 (s, Acm CH<sub>3</sub>), 1.63-1.54 (m, D-Leu  $\gamma$ CH), 1.51-1.47 (m, D-Leu  $\beta$ CH<sub>2</sub>), 1.39, 1.30 (s, 9H, Boc CH<sub>3</sub>), 0.86 (dd, J = 11.5, 6.3 Hz, D-Leu CH<sub>3</sub>) ppm. <sup>13</sup>C NMR (101 MHz, (d<sub>6</sub>)DMSO):  $\delta$  = 172.08 (D-Leu CO), 171.83 (Pro  $\alpha$ CH), 170.94 (OMe CO), 169.27 (Acm CO), 153.45 (Boc CO), 78.42 (Boc Cq), 59.77 (Pro  $\alpha$ CH), 51.95 (OCH<sub>3</sub>, a), 51.85 (Cys  $\alpha$ CH), 50.46 (D-Leu  $\alpha$ CH), 46.51 (Pro  $\delta$ CH<sub>2</sub>), 41.54 (D-Leu  $\beta$ CH<sub>2</sub>), 40.54 (Acm CH<sub>2</sub>), 31.93 (Cys(4)  $\beta$ CH<sub>2</sub>), 31.19 (Pro  $\beta$ CH<sub>2</sub>), 28.02, 27.88 (Boc CH<sub>3</sub>), 24.04 (D-Leu  $\gamma$ CH), 23.05 (Pro  $\gamma$ CH<sub>2</sub>), 22.49 (Acm CH<sub>3</sub>), 24.05, 21.43 (D-Leu CH<sub>3</sub>) ppm. IR:  $\tilde{\nu}$  = 3421, 3067, 2957, 2872, 1748, 1654, 1540, 1391, 1367, 1258, 1209, 1164, 1125, 1092, 1092, 1032, 1001, 922, 889, 856, 774 cm<sup>-1</sup>. FAB *m/z*: 441.2 (100) [M + Na]<sup>+</sup>, 320.2 (0.1) [M - Boc + H]<sup>+</sup>, 420.2 (43), [M + H]<sup>+</sup>. C<sub>23</sub>H<sub>40</sub>N<sub>4</sub>O<sub>7</sub>S (516.66): calcd. C 53.47, H 7.80, N 10.84, S 6.21; found C 53.24, H 7.85, N 10.24, S 5.63.

X = L-Leu (**7**, 72%). M. p. 132°C. <sup>1</sup>H NMR (400 MHz, (d<sub>6</sub>)DMSO):  $\delta$  = 8.48 (t, J = 6.2 Hz, Acm NH), 8.32 (dd, J = 31.5, 7.2 Hz, Cys NH), 7.87 (d, J = 8.1 Hz, L-Leu NH), 4.47 (Hc, Cys  $\alpha$ CH<sub>2</sub>), 4.40-4.32 (m, L-Leu  $\alpha$ CH), 4.27-4.13 (m, Acm CH<sub>2</sub>, Pro  $\alpha$ CH), 3.62 (s, OCH<sub>3</sub>), 3.38-3.22 (m, Pro  $\delta$ CH<sub>2</sub>), 2.99-2.81 (m, Cys  $\beta$ CH<sub>2</sub>), 2.15-2.05/1.84-1.59 (m, Pro  $\gamma,\beta$ CH<sub>2</sub>), 1.84 (s, Acm CH<sub>3</sub>), 1.47-1.44 (m, L-Leu  $\beta$ CH), 1.39, 1.32 (m, Boc CH<sub>3</sub>), 0.87 (dd, J = 16.1, 6.8 Hz, L-Leu CH<sub>3</sub>) ppm. <sup>13</sup>C NMR (101 MHz, (d<sub>6</sub>)DMSO):  $\delta$  = 172.18 (CO), 170.88 (CO), 169.40 (CO), 153.29 (Boc CO), 78.25 (Boc qC), 59.12 (Pro  $\alpha$ CH), 59.30 (Cys  $\alpha$ CH), 51.94 (OCH<sub>3</sub>), 50.58 (L-Leu  $\alpha$ CH), 46.43 (Pro  $\delta$ CH<sub>2</sub>), 40.95 (L-Leu  $\beta$ CH), 40.42 (Acm CH<sub>2</sub>), 31.22 (Cys  $\beta$ CH<sub>2</sub>), 30.62 (Pro  $\beta/\gamma$ CH<sub>2</sub>), 27.89 (Boc CH<sub>3</sub>) ppm. IR:  $\tilde{\nu}$  = 3300, 3060, 2956, 2931, 2872, 1750, 1690, 1645, 1540, 1480, 1438, 1405, 1366, 1345, 1317, 1270, 1244, 1225, 1165, 1125, 1096, 1026, 998, 976, 927, 862, 774, 709, 669 cm<sup>-1</sup>. FAB *m/z*: 539.3 (68) [M + Na]<sup>+</sup>, 517.3 (39) [M + H]<sup>+</sup>, 417.3 (39) [M - Boc + H]<sup>+</sup>. C<sub>23</sub>H<sub>40</sub>N<sub>4</sub>O<sub>7</sub>S (516.66): calcd. C 53.47, H 7.80, N 10.84, S 6.21; found C 53.03, H 8.13, N 10.66, S 5.85.

**Standard procedure for synthesis of tetrapeptide Boc-Cys(Trt)-Pro-X-Cys(Acm)-OMe using DCCI/HOBt:** Boc-Cys(Trt)-OH (9.4 mmol) was dissolved in DMF (25 mL) and cooled to -18°C. Whilst stirring, DCCI (0.012 mol) and HOBt (0.012 mol) were dissolved in DMF (60 mL) and added one after another to the solution. The reaction mixture was stirred for 30 minutes at -20°C. A cooled solution of deprotected compound H-Pro-X-Cys(Acm)-OMe\*CF<sub>3</sub>COOH (9.4 mmol) and NMM (0.04 mol) dissolved in DMF was added at once to the reaction mixture. Afterwards the reaction mixture was stirred for two hours at -20°C and stirred for additional 20 hours at 20°C. The reaction mixture was allowed to stand for one hour and the precipitated dicyclohexylurea was filtered off. The solvent was evaporated, the residue was dissolved in ethyl acetate/5% KHCO<sub>3</sub> and additional dicyclohexylurea was filtered off. The filtrate was washed with 5% KHCO<sub>3</sub> (80 mL, four times), 5% KHSO<sub>4</sub> (80 mL, three times) and brine (80 mL). The collected organic layers were dried over Na<sub>2</sub>SO<sub>4</sub> and the solvent was evaporated. As raw product a yellow foam was obtained which was purified using column chromatography. Elution with DCM/Et<sub>2</sub>O (1:1), DCM/EtOAc (2:3) and ethyl acetate afforded the pure product as colorless foam.

X = D-Leu (**4**, 67%). M.p. 99°C. <sup>1</sup>H NMR (400 MHz, (d<sub>6</sub>)DMSO): 8.47 (t, J = 6.2 Hz, 1H, Acm NH), 8.20 (d, J = 7.8 Hz, Cys(4) NH), 7.87 (d, J = 8.7 Hz, D-Leu NH), 7.41-7.19 (m, Ar-H), 7.05 (d, J = 8.5 Hz, 1H, Cys(1) NH), 4.45 (Hc, Cys(4) αCH), 4.32-4.13 (m, D-Leu αCH, Acm CH<sub>2</sub>, Pro αCH), 4.03 (Hc, Cys(1) αCH), 3.62 (s, OCH<sub>3</sub>), 3.27-3.20, 2.86-2.81 (m, Pro δCH<sub>2</sub>), 2.92 (Ha, Hb, Cys(4) βCH<sub>2</sub>), 2.53, 2.32 (Ha, Hb, Cys(1) βCH<sub>2</sub>), 1.85 (s, Acm CH<sub>3</sub>), 1.99-1.65 (m, Pro βCH<sub>2</sub>, Pro γCH<sub>2</sub>), 1.60-1.38 (m, D-Leu βCH<sub>2</sub>, Leu γCH), 1.35 (s, Boc CH<sub>3</sub>), 170.80 (dd, J = 11.1, 6.1 Hz, D-Leu CH<sub>3</sub>), ppm. <sup>13</sup>C NMR (101 MHz, (d<sub>6</sub>)DMSO): δ = 171.85 (D-Leu CO), 170.95 (OMe CO), 170.87 (Pro CO), 169.39 (Acm CO), 168.66 (Cys(1) CO), 155.06 (Boc CO), 144.32 (Ar C), 129.17 (Ar C), 127.97 (Ar C), 126.69 (Ar C), 78.20 (Boc qC), 66.39 (Ar qC), 59.83 (Pro αCH), 52.16 (Cys(1) αCH), 51.93 (Cys(4) αCH), 51.93 (OCH<sub>3</sub>), 50.43 (D-Leu αCH), 46.43 (Pro δCH<sub>2</sub>), 40.66 (D-Leu βCH<sub>2</sub>), 40.47 (Acm CH<sub>2</sub>), 32.53 (Cys(1) βCH<sub>2</sub>), 31.88 (Cys(4) βCH<sub>2</sub>), 29.07 (Pro βCH<sub>2</sub>), 28.08 (Boc CH<sub>3</sub>, s), 24.37 (Pro γCH<sub>2</sub>), 24.11 (D-Leu γCH), 22.99 (Acm CH<sub>3</sub>), 22.51, 21.32 (D-Leu CH<sub>3</sub>) ppm. IR:  $\tilde{\nu}$  = 3365, 3280, 3082, 2954, 1738, 1707, 1650, 1559, 1545, 1527, 1472, 1457, 1436, 1418, 1370, 1328, 1279, 1255, 1243, 1176, 1113, 146, 1012, 705 cm<sup>-1</sup>. FAB *m/z*: 243.0 (100) [Trt + H]<sup>+</sup>, 884.1 (15) [M + Na]<sup>+</sup>. C<sub>45</sub>H<sub>59</sub>N<sub>5</sub>O<sub>8</sub>S<sub>2</sub> (862.13): calcd. C 62.69, H 6.90, N 8.16, S 7.44; found C 62.44, H 7.07, N 7.96, S 7.44.

X = L-Leu (**5**, 65%). M. p. 93°C. <sup>1</sup>H NMR (400 MHz, (d<sub>6</sub>)DMSO): 8.47 (t, J = 6.2 Hz, Acm NH), 8.25 (d, J = 7.6 Hz, Cys(4) NH), 7.74 (d, J = 8.2 Hz, L-Leu NH), 7.40-7.21 (m, Ar H), 7.16 (d, J = 8.5 Hz, Cys(1) NH), 4.45 (Hc, Cys(4) αCH), 4.32-4.14 (m, Pro αCH, L-Leu αCH, Acm CH<sub>2</sub>), 3.99 (Hc, Cys(1) αCH), 3.61 (s, OCH<sub>3</sub>), 3.17, 2.68 (m, Pro δCH<sub>2</sub>), 2.96, 2.82 (Ha, Hb, Cys(4) βCH<sub>2</sub>), 2.54, 2.27 (Hc, Cys(1) βCH<sub>2</sub>), 2.02-1.66 (m, Pro βCH<sub>2</sub>, Acm CH<sub>3</sub>, Pro γCH<sub>2</sub>), 1.64-1.47 (m, L-Leu γCH), 1.47-1.46 (m, L-Leu βCH<sub>2</sub>), 0.79 (dd, J = 23.3, 6.5 Hz, L-Leu CH<sub>3</sub>) ppm. <sup>13</sup>C NMR (101 MHz, (d<sub>6</sub>)DMSO): δ = 172.00 (L-Leu CO), 170.84 (OMe CO), 170.61 (Pro CO), 169.40 (Acm CO), 168.70 (Cys(1) CO), 155.09 (Boc CO), 144.31 (Ar C), 129.16 (Ar CO), 127.95 (Ar C), 126.68 (Ar C), 78.13 (Boc qC), 66.39 (Ar qC), 59.07 (Pro αCH), 52.33 (Cys(1) αCH), 52.26 (Cys(4) αCH), 51.93 (OMe), 50.74 (L-Leu αCH), 46.21 (Pro-δCH<sub>2</sub>), 40.82 (L-Leu βCH<sub>2</sub>), 40.43 (Acm CH<sub>2</sub>), 32.43 (Cys(1) βCH<sub>2</sub>) 31.38 (Cys(4) βCH<sub>2</sub>), 28.39 (Pro βCH<sub>2</sub>), 28.11

(Boc CH<sub>3</sub>), 24.28 (Pro  $\gamma$ CH<sub>2</sub>), 23.96 (L-Leu  $\gamma$ CH), 22.88, 21.69 (L-Leu CH<sub>3</sub>), 22.49 (Acm CH<sub>3</sub>) ppm. IR:  $\tilde{\nu}$  = 3309, 3057, 2956, 2930, 2871, 1745, 1702, 1691, 1658, 1635, 1596, 1527, 1443, 1391, 1367, 1251, 1168, 1095, 1034, 859, 744, 702, 676, 622, 506 cm<sup>-1</sup>. FAB  $m/z$ : 884.3 (10) [M + Na]<sup>+</sup>, 243.0 (100), [Trt + H]<sup>+</sup>. C<sub>45</sub>H<sub>59</sub>N<sub>5</sub>O<sub>8</sub>S<sub>2</sub> (862.13): calcd. C 62.69, H 6.90, N 8.16, S 7.44; found C 59.97, H 6.83, N 7.23, S 6.15.

## X-Ray structural details

**Comparison with cyclo(Boc-Pro-Gly-Cys-OMe) (3):** Unlike in the peptide with X = Gly (**3**) previously reported by us,<sup>3</sup> D-Leucine and L-Leucine are chiral amino acids. However, the crystal structures of **1** and **3** are very similar with a RMSD value of 0.0743 Å for the peptide backbone. **1** and **3** show similar dihedral angles except for  $\Phi_X$  and  $\Psi_X$ . In contrast, the dihedral angles  $\Phi_X$  and  $\Psi_X$  of **2a** and **2b** are closer to the values of **3** (Table S2). Compared to **3**, **2a** and **2b** the dihedral angles of **1** are closer to the values of an ideal  $\beta$ -turn II structure. Like **3**, the disulfide bridge of **1**, **2a** and **2b** show a left-handed orientation evidenced by the  $\chi_{ss}$  values in the range of 79.5 - 86.3 °, which are close to the ideal strain free value of 90°. The intermolecular interactions of **1** are similar to **3**, since the amide hydrogen atom (see N2, Figure 2 main text) is forming a hydrogen bond with the carbonyl oxygen (O1) of the Pro residue of another peptide molecule of **1**. Also, the Cys1 amide hydrogen proton (N4) interacts with the carbonyl oxygen (O6) of the neighbor molecule. **2a** shows similar intermolecular interactions as **1** and **3**: the amide hydrogen proton HN<sub>L-Leu</sub> (N2) of **2a** is involved in a hydrogen bond with the carbonyl oxygen C=O<sub>Pro</sub> (O9) of **2b** and HN<sub>Cys1</sub> interacts with the oxygen of C=O<sub>Boc</sub> of **2b** (Figure 2, right). In contrast, the amide proton HN<sub>L-Leu</sub> (N6) of conformer **2b** forms an hydrogen bond with the oxygen (O2) of C=O<sub>L-Leu</sub> of **2a**. Additionally, the amide proton of Cys1 (N8) interacts with the carbonyl oxygen (O10) of C=O<sub>L-Leu</sub> of another molecule of **2b**.

**Table S1.** Crystallographic data obtained for **1** and **2**

| Empirical formula                   | C <sub>23</sub> H <sub>38</sub> N <sub>4</sub> O <sub>7</sub> S <sub>2</sub> ( <b>1</b> ) | C <sub>23</sub> H <sub>38</sub> N <sub>4</sub> O <sub>7</sub> S <sub>2</sub> ( <b>2</b> ) |
|-------------------------------------|-------------------------------------------------------------------------------------------|-------------------------------------------------------------------------------------------|
| $M_r$ (g mol <sup>-1</sup> )        | 546.69                                                                                    | 546.69                                                                                    |
| $\lambda$ (Å)                       | 0.71073                                                                                   | 1.54178                                                                                   |
| crystal size (mm <sup>3</sup> )     | 0.20 x 0.10 x 0.10                                                                        | 0.18 x 0.06 x 0.02                                                                        |
| crystal system                      | monoclinic                                                                                | orthorhombic                                                                              |
| space group                         | $P2_1$                                                                                    | $P2_1 2_1 2_1$                                                                            |
| $T$ (K)                             | 213(2)                                                                                    | 100                                                                                       |
| $a$ (Å)                             | 5.067(2)                                                                                  | 16.1483(11)                                                                               |
| $b$ (Å)                             | 18.451(8)                                                                                 | 18.7091(12)                                                                               |
| $c$ (Å)                             | 14.842(7)                                                                                 | 18.8204(12)                                                                               |
| $\beta$ (°)                         | 95.254(9)                                                                                 |                                                                                           |
| $V$ (Å <sup>3</sup> )               | 1381.8(10)                                                                                | 5686.0(6)                                                                                 |
| $Z$                                 | 2                                                                                         | 8                                                                                         |
| $\rho_{calc}$ (g cm <sup>-3</sup> ) | 1.314                                                                                     | 1.277                                                                                     |

|                                    |                |            |
|------------------------------------|----------------|------------|
| $\mu$ (mm <sup>-1</sup> )          | 0.240          | 2.090      |
| $2\theta_{\max}$ (°)               | 50.00          | 100        |
| data collected / unique            | 7437/4686      | 64928/6939 |
| $R_{\text{int}}$                   | 0.0674         | 0.1092     |
| observed data ( $I > 2\sigma(I)$ ) | 4686           | 5623       |
| Goodness-of-fit on $F^2$           | 1.031          | 1.018      |
| refined parameters                 | 334            | 662        |
| $R_1$ ( $I > 2\sigma(I)$ )         | 0.0743         | 0.058      |
| $wR_2$ (all data)                  | 0.1879         | 0.146      |
| residuals (e Å <sup>-3</sup> )     | 0.932 / -0.619 | 0.5 / -0.3 |

**Table S2.** Dihedral angles of peptide backbone of **1** and **2** in comparison to **3**

|                        | <b>1</b> | <b>2a</b> | <b>2b</b> | <b>3</b> | $\beta$ -turns <sup>4</sup> |         |          |
|------------------------|----------|-----------|-----------|----------|-----------------------------|---------|----------|
|                        |          |           |           |          | type I                      | type II | type III |
| $\Phi_{\text{Cys1}}$   | -133.5   | -133.2    | -127.5    | -140.1   |                             |         |          |
| $\Psi_{\text{Cys1}}$   | 47.7     | 55.2      | 57.8      | 52.2     |                             |         |          |
| $\omega_{\text{Cys1}}$ | 172.6    | 175.1     | -175.3    | 176.9    |                             |         |          |
| $\Phi_{\text{Pro2}}$   | -62.5    | -60.3     | -68.2     | -62.2    | -60                         | -60     | -60      |
| $\Psi_{\text{Pro2}}$   | 139.0    | 142.6     | 133.6     | 135.6    | -30                         | 120     | -30      |
| $\omega_{\text{Pro2}}$ | 179.4    | 177.3     | 179.6     | 178.4    |                             |         |          |
| $\Phi_{\text{X}}$      | 83.5     | 64.3      | 65.5      | 60.4     | -90                         | 80      | -60      |
| $\Psi_{\text{X}}$      | 0.03     | 12.5      | 20.9      | 29.4     | 0                           | 0       | -30      |
| $\omega_{\text{X}}$    | 177.5    | 179.1     | 168.6     | 174.1    |                             |         |          |
| $\Phi_{\text{Cys4}}$   | -80.5    | -77.7     | -72.9     | -78.8    |                             |         |          |
| $\chi^1_{\text{Cys1}}$ | -137.7   | -138.5    | -149.0    | -135.5   |                             |         |          |
| $\chi^2_{\text{Cys1}}$ | -53.05   | -55.0     | -51.1     | -52.9    |                             |         |          |
| $\chi^1_{\text{Cys4}}$ | -66.2    | -72.1     | -69.6     | -75.6    |                             |         |          |
| $\chi^2_{\text{Cys4}}$ | 174.6    | 178.1     | 175.4     | 174.9    |                             |         |          |
| $\chi_{\text{ss}}$     | -82.1    | -79.5     | -86.3     | -85.2    |                             |         |          |
| $\chi^1_{\text{Pro2}}$ | 32.4     | 26.7      | 25.7      | 28.1     |                             |         |          |
| $\chi^2_{\text{Pro2}}$ | -39.6    | -37.2     | -37.6     | -38.5    |                             |         |          |
| $\chi^3_{\text{Pro2}}$ | 30.5     | 31.6      | 34.3      | 33.4     |                             |         |          |
| $\chi^4_{\text{Pro2}}$ | -10.1    | -15.4     | -18.9     | -16.7    |                             |         |          |
| $\theta_{\text{Pro2}}$ | -13.7    | -7.0      | -3.8      | -6.9     |                             |         |          |

$\phi$  = C-N-C $\alpha$ -C;  $\psi$  = N-C $\alpha$ -C-N;  $\omega$  = C $\alpha$ -C-N-C $\alpha$ ;  $\chi_{\text{Cys1}}^1$  = N-C $\alpha$ -C $\beta$ -S;  $\chi_{\text{Cys2}}^2$  = C $\alpha$ -C $\beta$ -S-S;  
 $\chi^1_{\text{Pro}} = \text{N-C}\alpha\text{-C}\beta\text{-C}\gamma$ ;  $\chi^2_{\text{Pro}} = \text{C}\alpha\text{-C}\beta\text{-C}\gamma\text{-C}\delta$ ;  $\chi^3_{\text{Pro}} = \text{C}\beta\text{-C}\gamma\text{-C}\delta\text{-N}$ ;  $\chi^4_{\text{Pro}} = \text{C}\gamma\text{-C}\delta\text{-N-C}\alpha$ ,  $\theta_{\text{Pro}} = \text{C}\delta\text{-N-C}\alpha\text{-C}\beta$ ,  
 $\chi_{\text{ss}} = \text{C}\beta\text{-S-S-C}\beta$ .

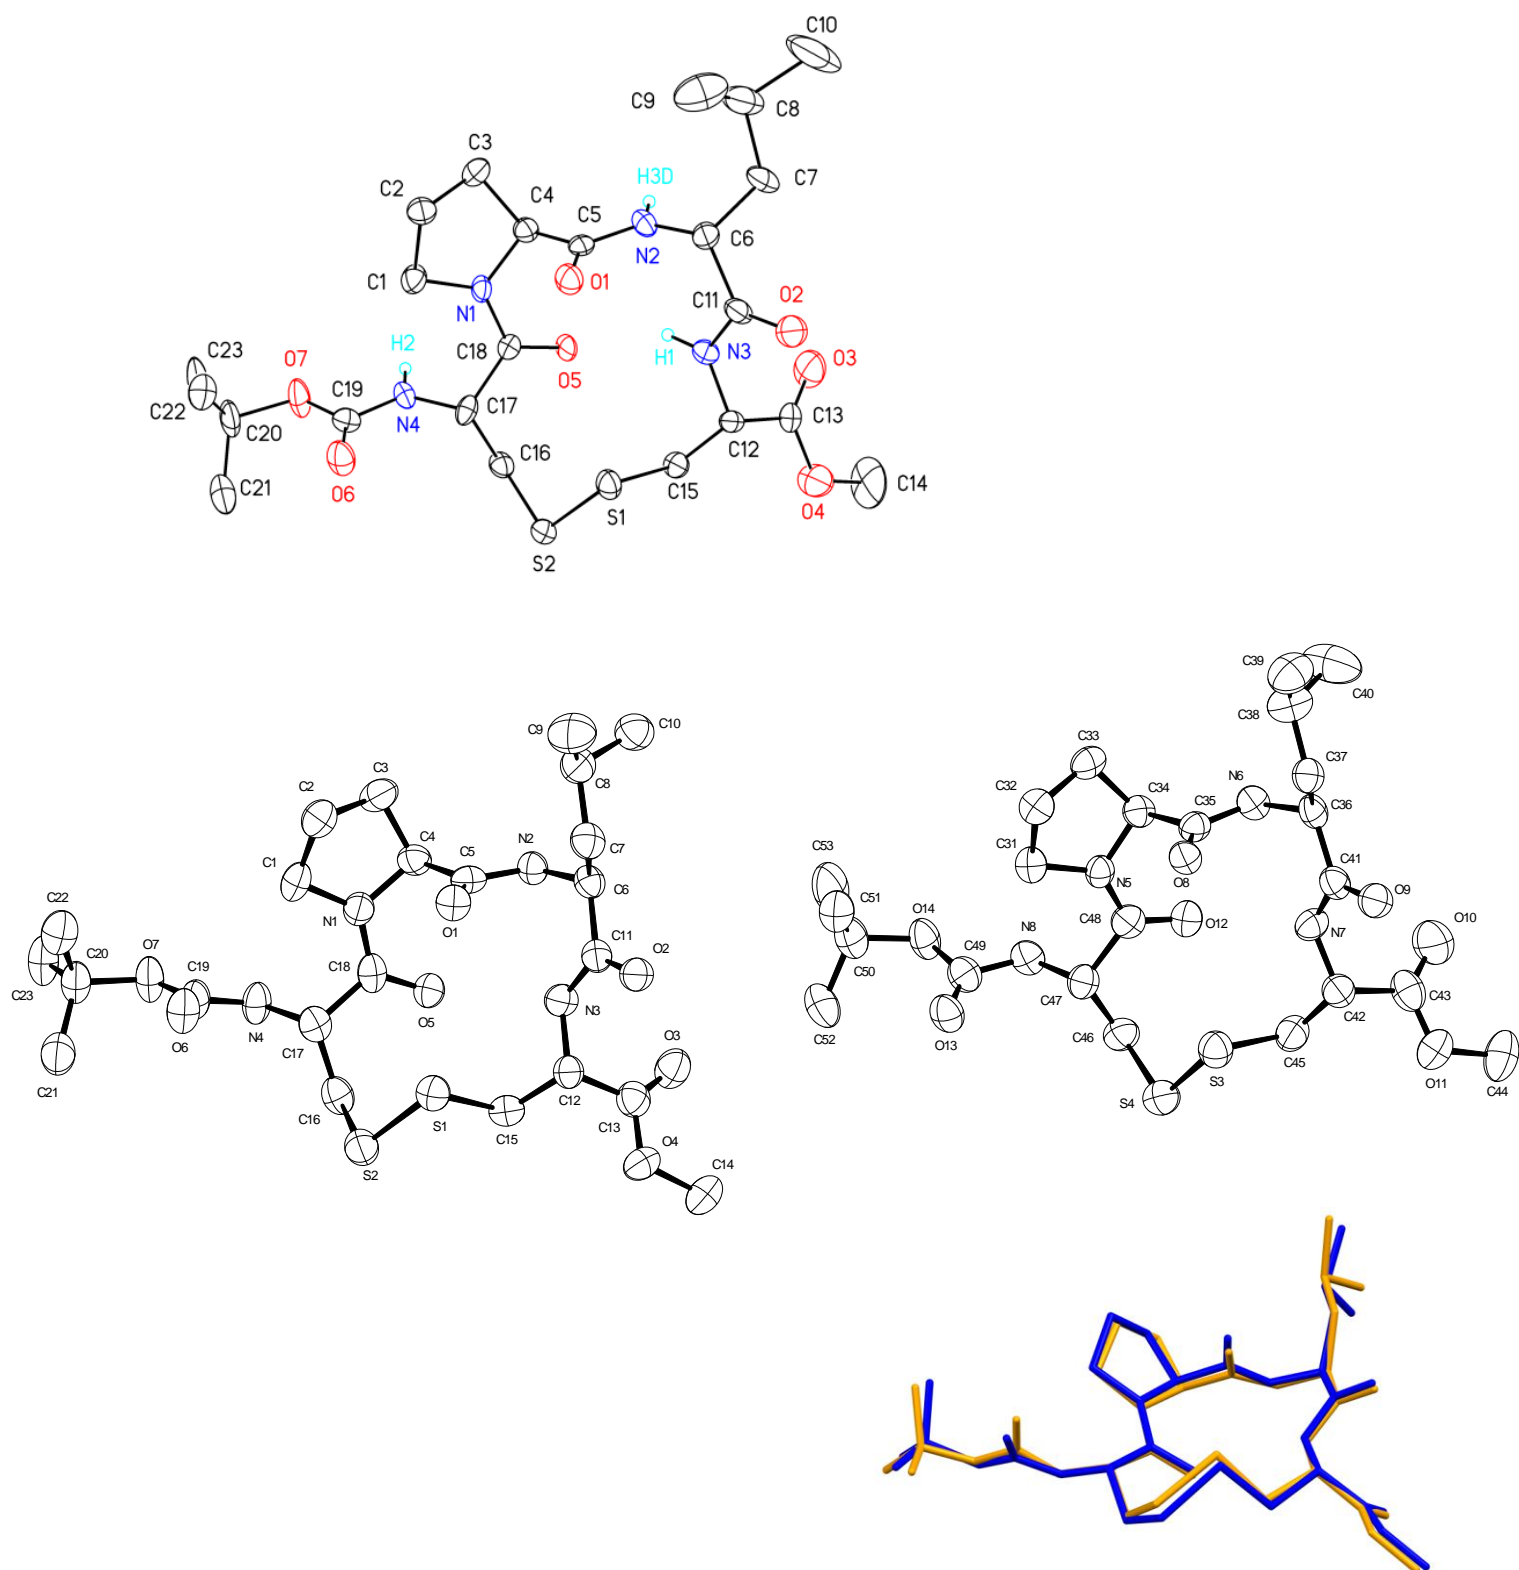

**Figure S1.** Crystal structures of **1** (top), **2a** (middle left) and **2b** (middle right) and overlay of the two crystallographically independent molecules of **2** (bottom)



## NMR studies

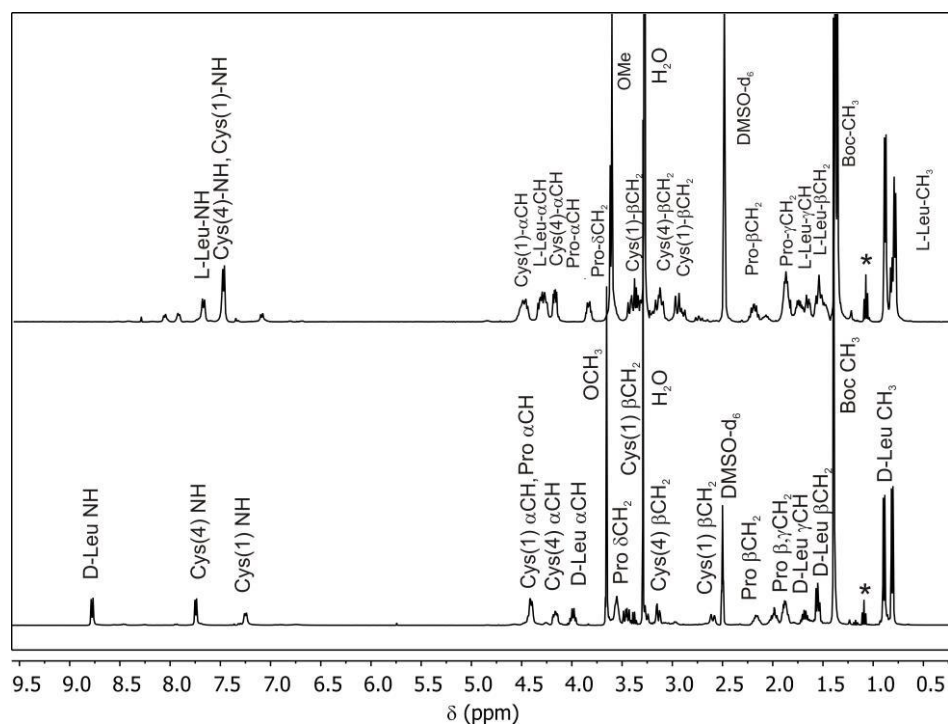

**Figure S2.** 400 MHz  $^1\text{H}$  NMR spectra of cyclo(Boc-Cys-Pro-X-Cys-OMe) in  $\text{DMSO-d}_6$ , X = D-Leu (**1**, bottom) and L-Leu (**2**, top). Signals marked with a star belong to diethyl ether

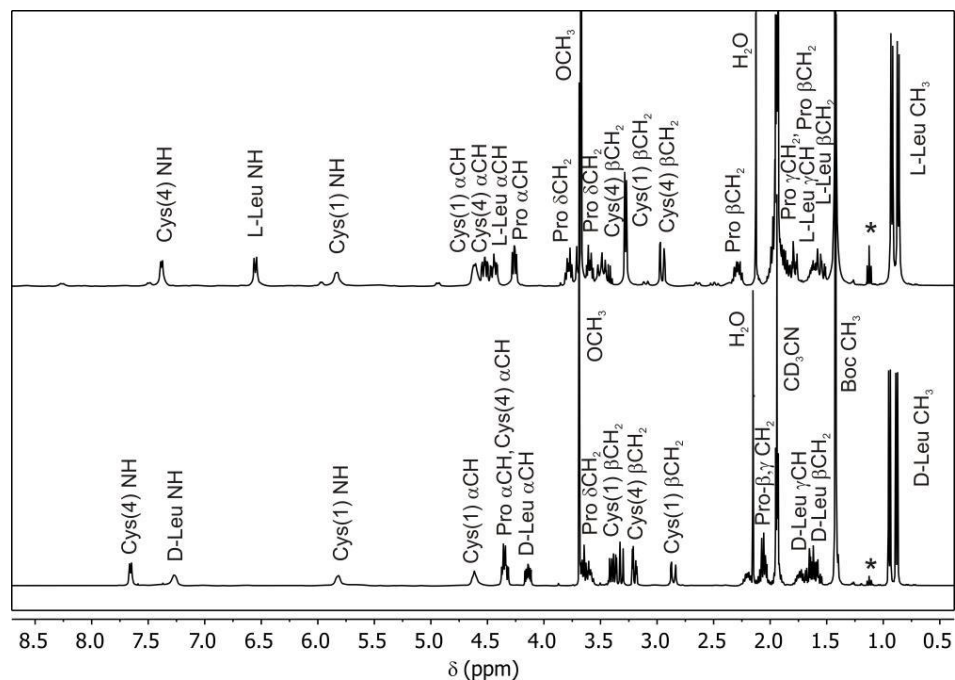

**Figure S3.** 400 MHz  $^1\text{H}$  NMR spectra of cyclo(Boc-Cys-Pro-X-Cys-OMe) in  $\text{CD}_3\text{CN}$ , X = D-Leu (**1**, bottom) and L-Leu (**2**, top). Signals marked with a star belong to diethyl ether





**Table S3.** Structural statistics of **1** and **2** in CD<sub>3</sub>CN

|                             | <b>1</b>    | <b>2</b>    |
|-----------------------------|-------------|-------------|
| <b>Distance constraints</b> |             |             |
| Total NOEs                  | 59          | 63          |
| Intra-residual NOEs         | 19          | 29          |
| NOE violations (> 0.5 Å)    | 1           | 0           |
| <b>RMSD</b>                 |             |             |
| Backbone atoms (Å)          | 0.15 ± 0.07 | 0.04 ± 0.01 |
| Heavy atoms (Å)             | 0.70 ± 0.32 | 0.52 ± 0.21 |

**Temperature-dependent <sup>1</sup>H NMR experiments**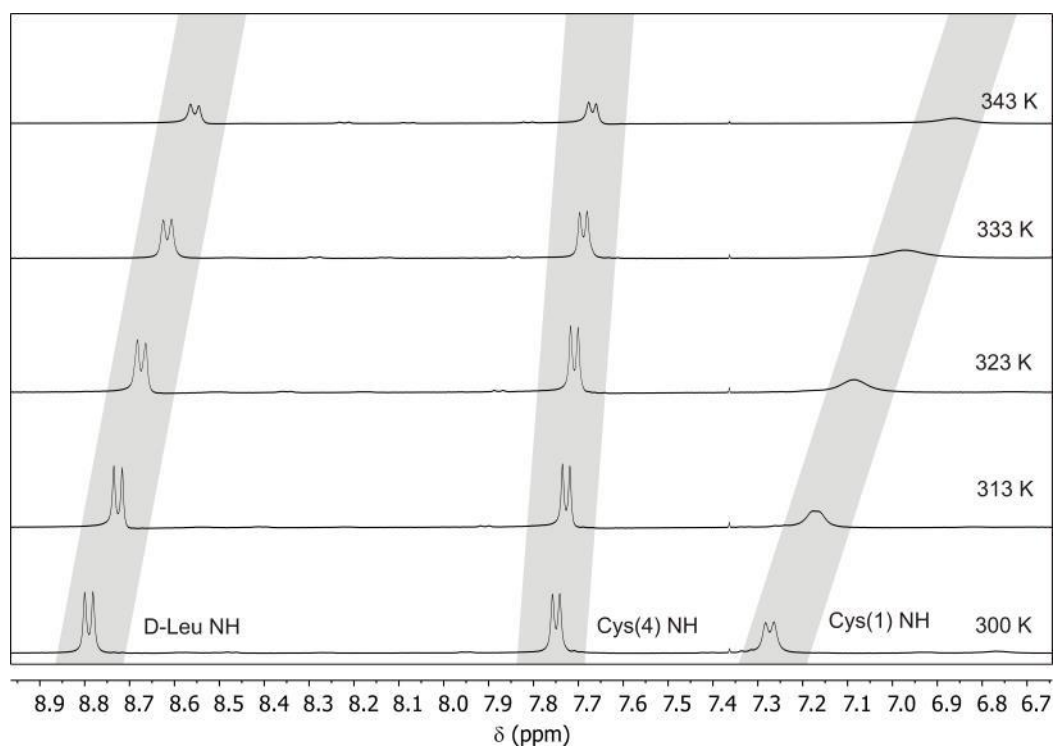**Figure S6.** Temperature-dependent <sup>1</sup>H NMR spectra of cyclo(Boc-Cys-Pro-D-Leu-Cys-OMe) (**1**) in DMSO-d<sub>6</sub>



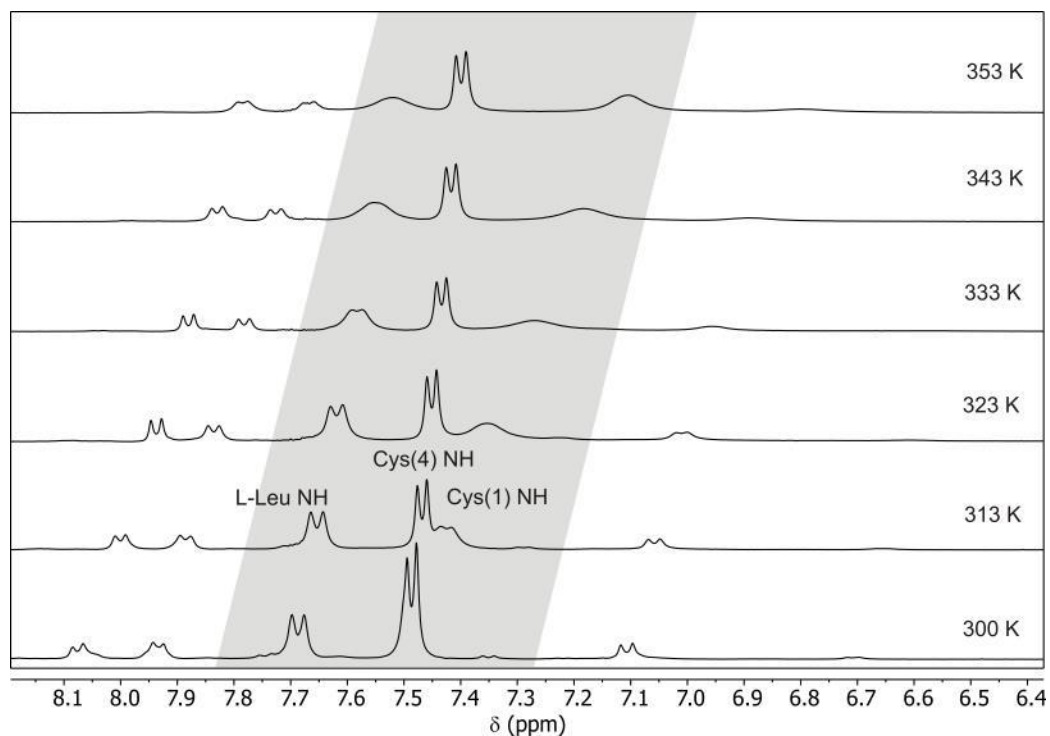

**Figure S7.** Temperature-dependent  $^1\text{H}$  NMR spectra of cyclo(Boc-Cys-Pro-L-Leu-Cys-OMe) (**2**) in  $\text{DMSO-d}_6$ . The assigned signals belong to the major conformation of **2**

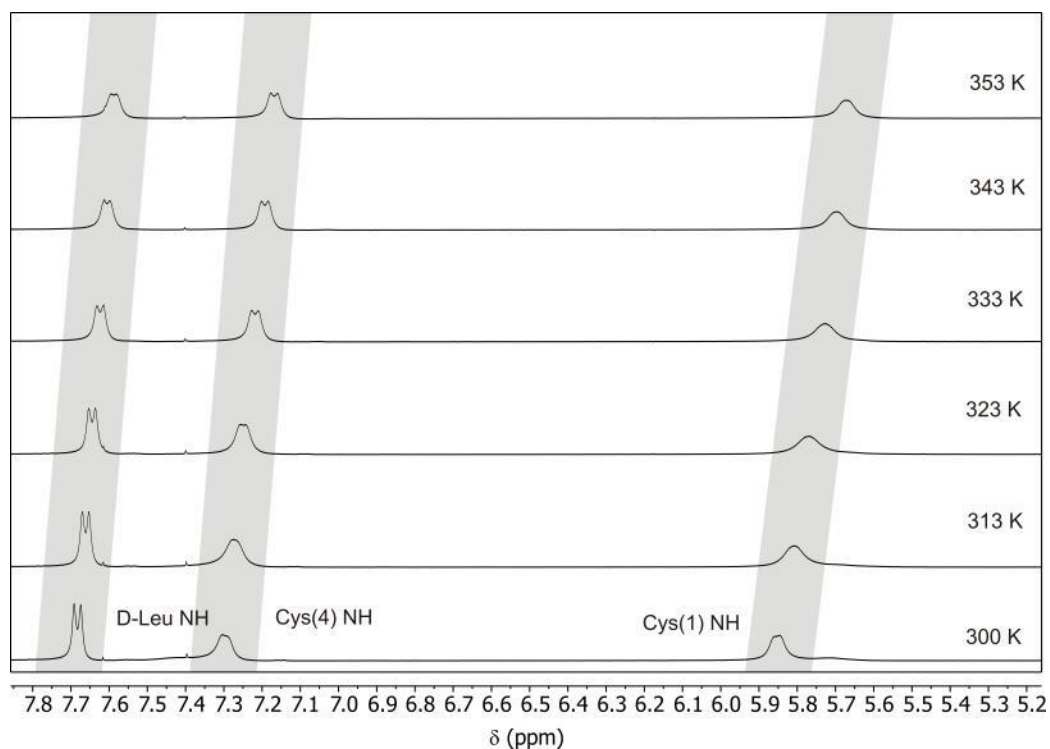

**Figure S8.** Temperature-dependent  $^1\text{H}$  NMR spectra of cyclo(Boc-Cys-Pro-D-Leu-Cys-OMe) (**1**) in  $\text{DMSO-d}_6$

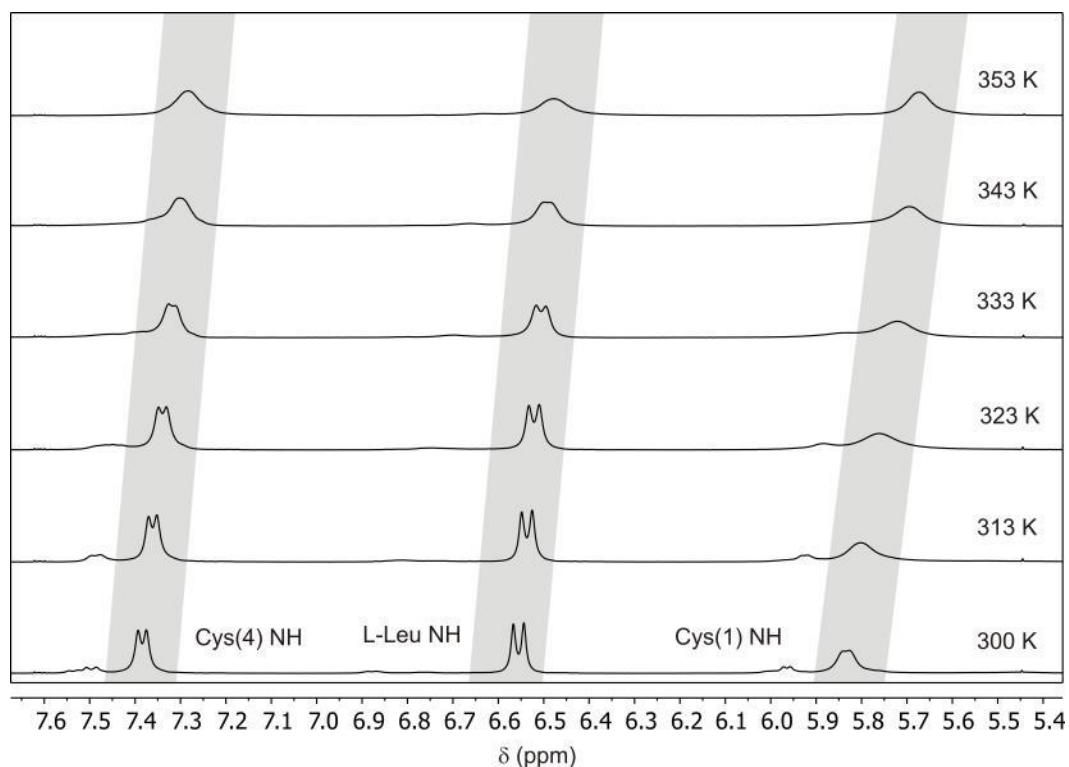

**Figure S9.** Temperature-dependent  $^1\text{H}$  NMR spectra of cyclo(Boc-Cys-Pro-L-Leu-Cys-OMe) (**2**) in  $\text{DMSO-d}_6$

#### Temperature-dependent FITR/ATR experiments

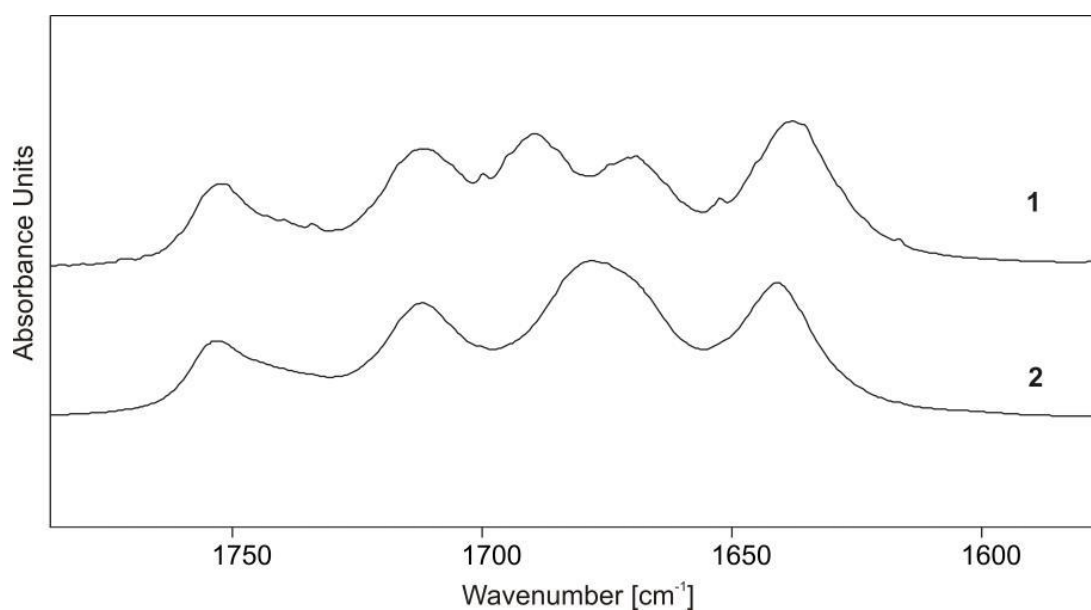

**Figure S10.** Static FTIR spectra of the cyclic tetrapeptides cyclo(Boc-Cys-Pro-X-Cys-OMe), X = D-Leu (**1**) or L-Leu (**2**) in  $\text{CH}_3\text{CN}$ ,  $T \sim 22^\circ\text{C}$ , spectral resolution is  $1\text{ cm}^{-1}$

## Computational Details

### REMD Results

**Table S4.** Values of the backbone angles  $\Phi$  and  $\Psi$  during the REMD simulations (300 K trajectory) and for representative structures obtained with the cluster analysis. Angles are in degrees and distances in Å. Values in ***bold italic*** are the ideal values used for defining the types of  $\beta$ -turn.<sup>4</sup> The REMD simulations of D-Leu<sub>I</sub> (peptide **1** with  $\beta$ -I turn structure as initial geometry) rapidly converged during the equilibration phase to a  $\beta$ -II turn structure which was conserved for the rest of the simulation. Our second set of calculations starting with  $\beta$ -I turns corroborates that the REMD simulations are independent of the starting geometries. However, in cases like **2** in which both  $\beta$ -II and  $\beta$ -I conformers have very similar stabilities, larger simulation times are needed to converge the values of conformer populations obtained from each simulation. Our work nevertheless clearly shows that while in **2** both conformers are possible, in **1** only the  $\beta$ -II structure is found.

| System              |               | $\Phi_{\text{Pro}}$ | $\Psi_{\text{Pro}}$ | $\Phi_{\text{X}}$ | $\Psi_{\text{X}}$ | $\text{Ca}_{\text{Cys1}}\text{-Ca}_{\text{Cys4}}$ | $\beta$ -turn |
|---------------------|---------------|---------------------|---------------------|-------------------|-------------------|---------------------------------------------------|---------------|
| D-Leu <sub>II</sub> | Cluster 300 K | -76                 | 110                 | 70                | 31                | 5.2                                               | II            |
|                     | Cluster 400 K | -77                 | 97                  | 93                | -14               | 5.5                                               | II            |
|                     | REMD          | -75 ± 8             | 110 ± 17            | 80 ± 13           | 6 ± 28            | 5.4 ± 0.3                                         | II            |
| L-Leu <sub>II</sub> | Cluster 300 K | -69                 | 106                 | 74                | 4                 | 5.6                                               | II            |
|                     | Cluster 400 K | -83                 | 106                 | 81                | -6                | 5.5                                               | II            |
|                     | REMD          | -75 ± 7             | -40 ± 15            | -140 ± 25         | 11 ± 41           | 5.5 ± 0.3                                         | I             |
|                     |               |                     | 107 ± 14            | 77 ± 10           |                   |                                                   | II            |
| L-Leu <sub>I</sub>  | Cluster 300 K | -66                 | -14                 | -116              | 12                | 5.4                                               | I             |
|                     | Cluster 400 K | -64                 | -23                 | -112              | 14                | 5.3                                               | I             |
|                     | REMD          | -65 ± 12            | -21 ± 15            | -108 ± 20         | 14 ± 33           | 5.4 ± 0.2                                         | I             |
|                     |               |                     | 119 ± 15            | 78 ± 11           |                   |                                                   | II            |
| Ideal values        |               | <b><i>-60</i></b>   | <b><i>-30</i></b>   | <b><i>-90</i></b> | <b><i>0</i></b>   | <b><i>&lt; 7.0</i></b>                            | I             |
|                     |               | <b><i>-60</i></b>   | <b><i>120</i></b>   | <b><i>80</i></b>  | <b><i>0</i></b>   | <b><i>&lt; 7.0</i></b>                            | II            |

## References

- (1) Sheehan, J. C.; Hess, G. P. A New Method of Forming Peptide Bonds. *Journal of the American Chemical Society* **1955**, 77, 1067–1068.
- (2) Kamber, B.; Hartmann, A.; Eisler, K.; Riniker, B.; Rink, H.; Sieber, P.; Rittel, W. The Synthesis of Cystine Peptides by Iodine Oxidation of S-Trityl-cysteine and S-Acetamidomethyl-cysteine Peptides. *Helvetica Chimica Acta* **1980**, 63, 899–915.
- (3) Li, F.; Bravo-Rodriguez, K.; Phillips, C.; Seidel, R. W.; Wieberneit, F.; Stoll, R.; Doltsinis, N. L.; Sanchez-Garcia, E.; Sander, W. Conformation and Dynamics of a Cyclic Disulfide-bridged Peptide: Effects of Temperature and Solvent. *The Journal of Physical Chemistry. B* **2013**, 117, 3560–70.
- (4) Venkatachalam, C. M. Stereochemical Criteria for Polypeptides and Proteins. V. Conformation of a System of Three Linked Peptide Units. *Biopolymers* **1968**, 6, 1425–1436.
